# Supplementary material
Source: Copernicus journal article supplement (doi:10.5194/egusphere-2026-1677)
Supplement: Supplementary file 1 [file egusphere-2026-1677-supplement.pdf]

1 Chemical characteristics and environmental drivers of nitrogen-containing organic  
2 aerosol formation in coastal and inland urban atmospheres in Myanmar

3  
4 Ning Zhang<sup>1,2</sup>, Jialiang Feng<sup>2</sup>, Simon Patrick O'Meara<sup>3,4</sup>, Ziyi Liu<sup>5</sup>, Yingge Ma<sup>6,7</sup>,  
5 Xinlei Ge<sup>8</sup>, Wenjing Li<sup>9</sup>, Piero Chiacchiaretta<sup>10,11</sup>, Piero Di Carlo<sup>10,11</sup>, Junfeng Wang<sup>1\*</sup>,  
6 Eleonora Aruffo<sup>11,12</sup>

7  
8 1. Jiangsu Key Laboratory of Atmospheric Environment Monitoring and Pollution  
9 Control (AEMPC), Collaborative Innovation Center of Atmospheric Environment and  
10 Equipment Technology (CIC-AEET), School of Environmental Science and  
11 Engineering, Nanjing University of Information Science and Technology, Nanjing  
12 210044, China

13 2. School of Environmental and Chemical Engineering, Shanghai University, Shanghai  
14 200444, China

15 3. Department for Earth and Environmental Sciences, University of Manchester,  
16 Manchester, M13 9PL, UK

17 4. National Centre for Atmospheric Science, University of Manchester, Manchester,  
18 M13 9PL, UK

19 5. Guangdong Provincial Key Laboratory of Atmospheric Environment and Pollution  
20 Control, College of Environment and Energy, South China University of Technology,  
21 Guangzhou Higher Education Mega Center, Guangzhou 510006, China

22 6. Shanghai Academy of Environmental Sciences, Shanghai 200233, China

23 7. State of Environmental Protection Key Laboratory of the Formation and Prevention  
24 of Urban Air Complex, Shanghai, 200233, China

25 8. School of Energy and Environment, Southeast University, Nanjing 211189, China

26 9. Meteorological Development and Planning Institute of China Meteorological  
27 Administration, Beijing, 100081, China

28 10. Department of Advanced Technologies in Medicine & Dentistry, University  
29 "G.d'Annunzio" of Chieti-Pescara, Chieti 66100, Italy

30 11. Center for Advanced Studies and Technology-CAST, Chieti 66100, Italy

31 12. Department of Science, University "G.d'Annunzio" of Chieti-Pescara, Chieti 66100,  
32 Italy

33  
34 \*Corresponding author: Wang, Junfeng (wangjunfeng@nuist.edu.cn); Aruffo, Eleonora  
35 (eleonora.aruffo@unich.it)

36  
37 The supplemental materials have 8 pages, 1 supporting texts, 7 figures, and 2  
38 tables:

39 **Text S1** HPLC separation setup, UHPLC-Orbitrap MS data analysis and  
40 quantification

41 **Figure S1** The map of Myanmar sampling location

42 **Figure S2** Chromatographic peaks of 3-NP standard substance in ESI- mode in  
43 Myanmar

44 **Figure S3** Calibration curve of 3-NP in acetonitrile

45 **Figure S4** The correlation between  $C_8H_9NO_4$ ,  $C_6H_5NO_4$  and levoglucosan

46 **Figure S5** Mass spectra reconstructions of CHON same peaks

47 **Figure S6** Distributions of simulated precursor mass concentrations for  $C_8H_9NO_4$   
48 and  $C_6H_5NO_4$  under different RH conditions

49 **Figure S7** The correlation between  $BeP/(BeP+BaP)$  and  $C_8H_9NO_4/C_6H_5NO_4$

50 **Table S1** The average number, peak area and corresponding compound species of  
51 different types of molecular formulas in Myanmar

52 **Table S2** Summary of the number, concentration, and ratio parameters of  
53 compounds in different subgroups

54

55

56

57

58 **Text S1** HPLC separation setup, UHPLC-Orbitrap MS data analysis and  
59 quantification

## 60 **1. Setting for UHPLC separation**

61 A Waters Acquity HSS T3 column (1.8  $\mu$ m, 100  $\times$  2.1 mm) was used to fulfill the  
62 separation with mixed mobile phase of (A) 0.1% formic acid solution and (B) 0.1%  
63 formic acid and acetonitrile. The gradient elution program was as follows: it started  
64 with 99% of A and 1% of B for 2 minutes, followed by a linear gradient to 100% of B  
65 over the next 11 minutes, continued with 100% of B for 2 minutes, then returned to 1%  
66 of B in 0.1 minutes, and maintained 1% of B for 6.9 minutes. The flow rate of the A  
67 and B mixtures was 300  $\mu$ L min<sup>-1</sup> (Wang et al., 2017).

## 68 **2. UHPLC-Orbitrap MS data analysis**

69 Non-target analysis was performed using the software MZmine 2.39 to analyze  
70 the UHPLC-Orbitrap MS data. This software provides essential functions for MS data  
71 processing, including raw data import, peak detection, shoulder peak filtering,

72 chromatogram deconvolution, and peak identification (Hu et al., 2016; Katajamaa et al.,  
73 2006; Pluskal et al., 2010). The detailed processing steps and parameter settings can be  
74 found in the previously published articles (Fuller et al., 2012; Kind and Fiehn, 2007;  
75 Lin et al., 2012a; Lin et al., 2012b; Wang et al., 2016). The determined molecular  
76 formulas are expressed as  $C_xH_yO_zN_mS_n$ , where x, y, z, m, and n correspond to the  
77 number of C, H, O, N, and S atoms in the molecular formula, respectively. Molecular  
78 formula determination is primarily based on the detected m/z values, with a tolerance  
79 of 2 ppm in both ESI<sup>±</sup> modes. The detected compounds in the ambient samples were  
80 compared with those in the blank samples, and only the compounds with a sample/blank  
81 peak area ratio of  $\geq 10$  were retained.

82 To obtain more reasonable molecular formulas, the following specific rules were  
83 applied (Koch and Dittmar, 2006): (1) Atom counts: 1-40 for 12C, 1-100 for 1H, 0-40  
84 for 16O, 0-5 for 14N, 0-2 for 32S; (2) Element ratios: in ESI<sup>-</sup> mode, 0.3-3.0 H/C, 0-3  
85 O/C, 0-0.5 N/C, 0-2.0 S/C; in ESI<sup>+</sup> mode, 0.3-3.0 H/C, 0-1.2 O/C, 0-1.0 N/C, 0-0.8  
86 S/C; (3) Double-Bond Equivalent (DBE value, calculated as  $1+(2C-H+N)/2$ ): ranges  
87 from 0 to 25.

### 88 3. Semi-quantification of the detected organic compounds

89 In this study, the peak areas of detected organic compounds were semi-quantified  
90 using 3-nitrophenol (3-NP) as an external standard, with estimated concentrations  
91 reported in  $\text{ng m}^{-3}$ . It is important to note that different organic compounds exhibit  
92 varying ionization efficiencies in mass spectrometry, introducing inherent uncertainties  
93 when comparing peak areas across different molecular species. To enable relative  
94 comparisons between samples, we assumed a uniform mass spectrometric response  
95 factor for all detected compounds.

96 For calibration, a standard solution of 3-NP (m/z 138) at 1000 ppb in acetonitrile  
97 was analyzed in ESI<sup>-</sup> mode (Fig. S2). A linear calibration curve ( $y = 893,319x$ ,  $R^2 =$   
98 0.999) was established using a dilution series of 3-NP (5, 10, 30, 50, 100, 500, and 1000  
99 ppb; Fig. S3).

101

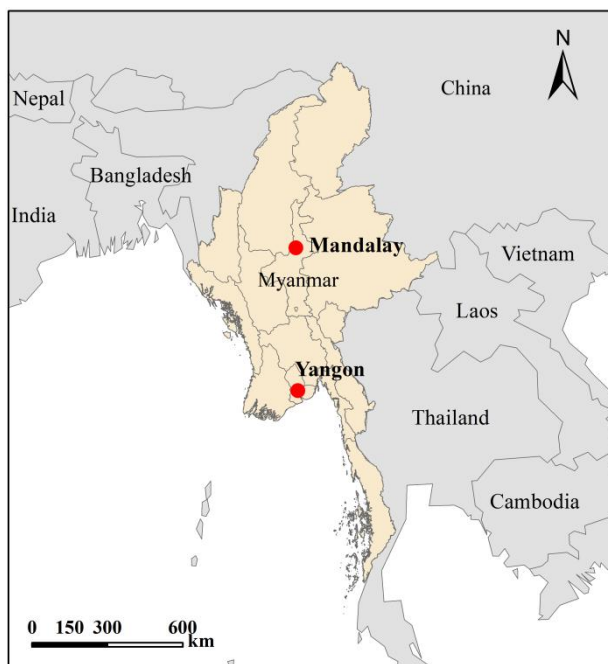

102

103

**Figure S1** The map of Myanmar sampling location

104

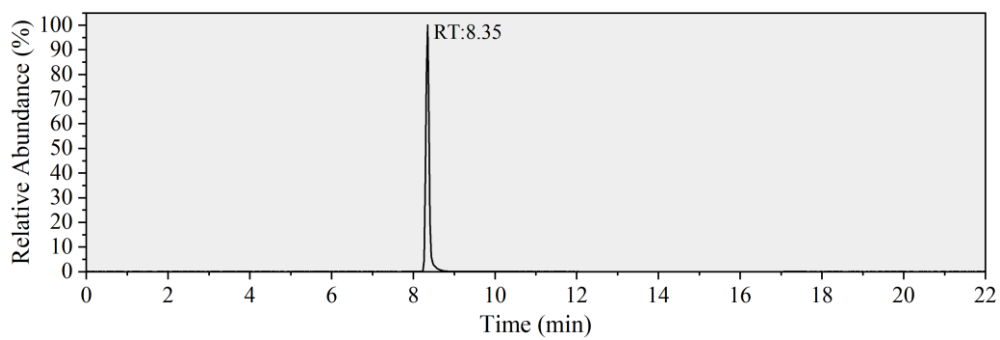

105

106

**Figure S2** Chromatographic peaks of 3-NP standard substance in ESI- mode in Myanmar

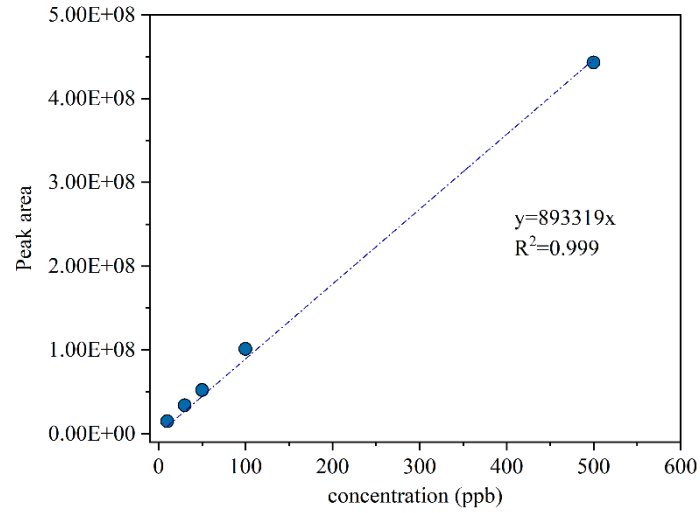

107

108

**Figure S3** Calibration curve of 3-NP in acetonitrile

109

110

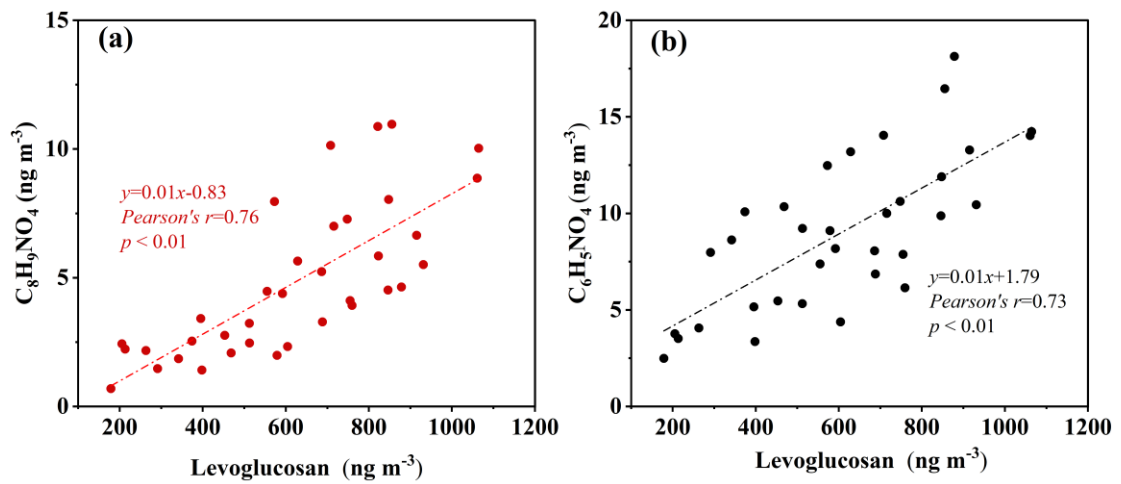

111

**Figure S4** The correlation between  $C_8H_9NO_4$  (a),  $C_6H_5NO_4$  (b) and levoglucosan. Color bar is the range of RH.

112

113

114

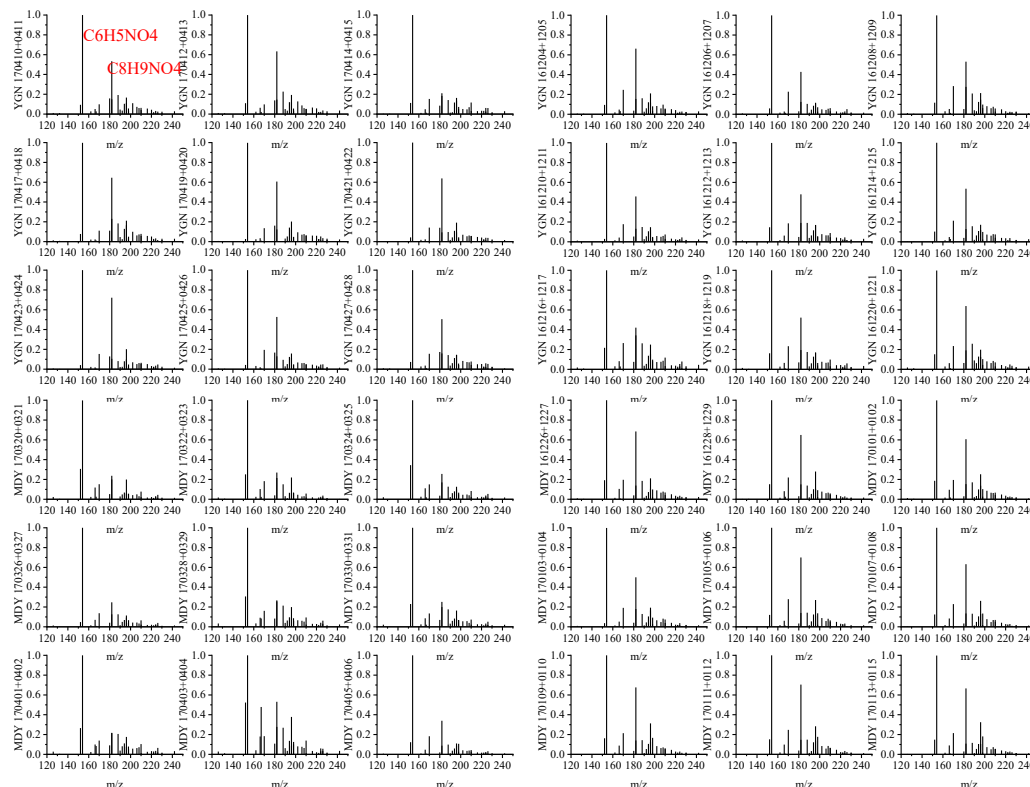

115

116 **Figure S5** Mass spectra reconstructions of CHON same peaks from extracted ion chromatograms  
 117 in ESI- mode. The vertical axis represents the semi-quantitative normalized concentration for each  
 118 compound.

119

120

121

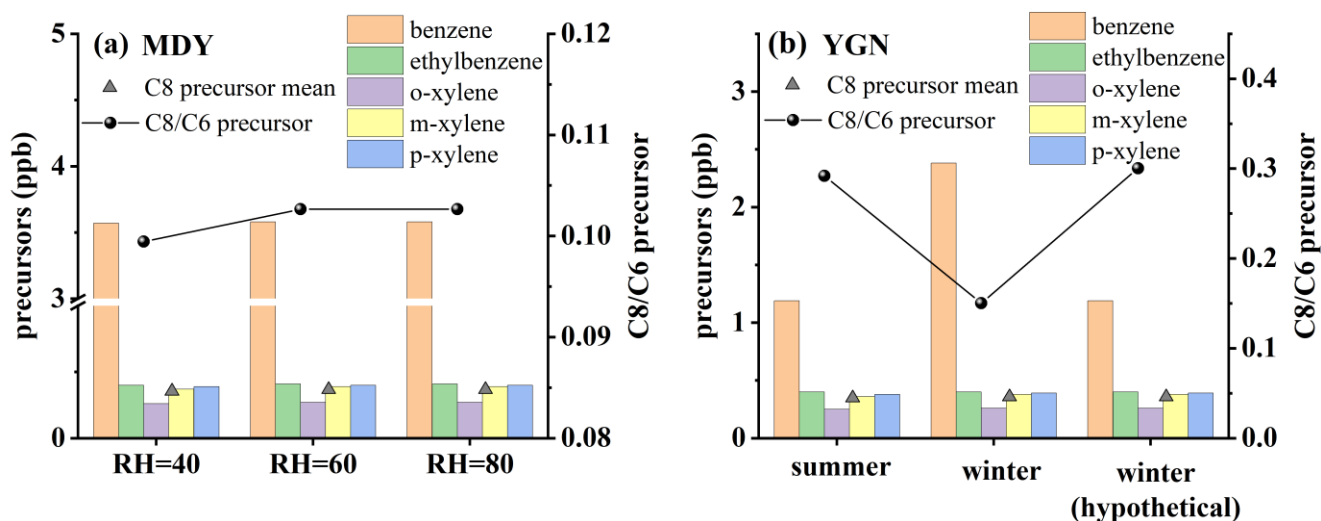

122

123 **Figure S6** Distributions of simulated precursor mass concentrations for  $C_8H_9NO_4$  and  $C_6H_5NO_4$   
 124 under different RH conditions. In the model, the precursors of  $C_8H_9NO_4$  include ethylbenzene, o-  
 125 xylene, m-xylene, and p-xylene, whereas benzene is the sole precursor of  $C_6H_5NO_4$ . Triangles  
 126 denote the average precursor concentration of  $C_8H_9NO_4$ .

127  
128  
129

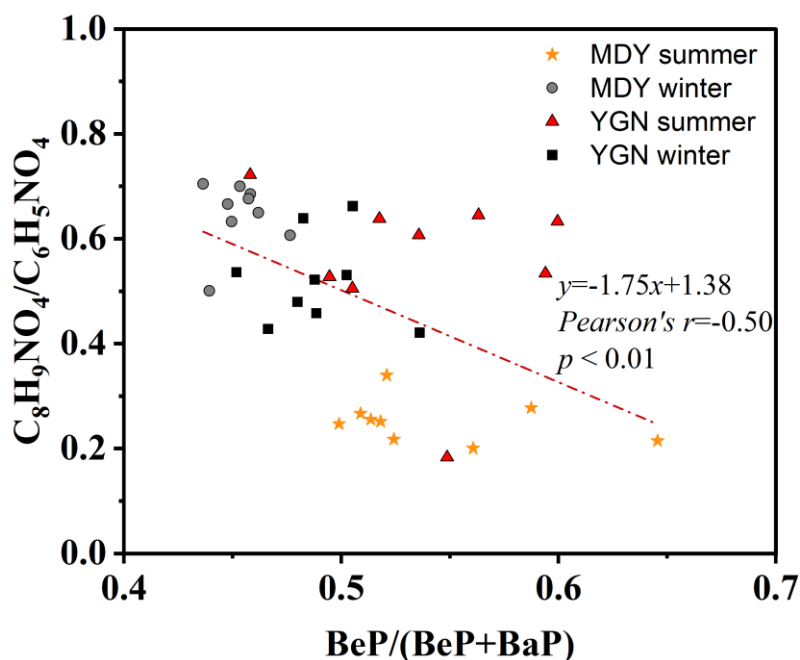

130  
131  
132  
133  
134  
135  
136  
137  
138

**Figure S7** The correlation between BeP/(BeP+BaP) and  $C_8H_9NO_4/C_6H_5NO_4$ .

**Table S1** The average number, peak area and corresponding compound species of different types of molecular formulas in Myanmar

| Ion mode | subgroup | number | Percentage (%) | Mass                              | Mass                            |
|----------|----------|--------|----------------|-----------------------------------|---------------------------------|
|          |          |        |                | concentration<br>( $ng\ m^{-3}$ ) | concentration<br>Percentage (%) |
| ESI-     | CHO-     | 520    | 54.4           | 164.3                             | 58.8                            |
|          | CHON-    | 166    | 16.9           | 62.3                              | 22.3                            |
|          | CHOS-    | 195    | 19.6           | 43.8                              | 15.7                            |
|          | CHONS-   | 73     | 7.0            | 6.8                               | 2.4                             |
|          | CHNS-    | 19     | 1.9            | 2.3                               | 0.8                             |
|          | CHN-     | 2      | 0.2            | 0.2                               | 0.1                             |

139  
140  
141  
142  
143

**Table S2** Summary of the number, concentration, and ratio parameters of compounds in different subgroups of  $PM_{2.5}$  in Yangon and Mandalay during the winter and summer seasons.

| Sample ID  | Subgroup | Number of compounds | Mass concentration ( $ng\ m^{-3}$ ) |
|------------|----------|---------------------|-------------------------------------|
| YGN-Summer | Total    | 772                 | 196.8                               |

| Sample ID  | Subgroup | Number of compounds | Mass concentration (ng m <sup>-3</sup> ) |
|------------|----------|---------------------|------------------------------------------|
|            | CHO      | 473                 | 127.4                                    |
|            | CHON     | 139                 | 44.2                                     |
|            | CHOS     | 117                 | 20.9                                     |
|            | CHONS    | 31                  | 2.2                                      |
|            | CHN      | 1                   | 0.1                                      |
|            | CHNS     | 11                  | 2.0                                      |
| YGN-Winter | Total    | 938                 | 241.4                                    |
|            | CHO      | 507                 | 148.5                                    |
|            | CHON     | 154                 | 43.7                                     |
|            | CHOS     | 191                 | 41.6                                     |
|            | CHONS    | 67                  | 5.7                                      |
|            | CHN      | 1                   | 0.0                                      |
|            | CHNS     | 18                  | 1.8                                      |
| MDY-Summer | Total    | 1064                | 342.7                                    |
|            | CHO      | 558                 | 197.2                                    |
|            | CHON     | 198                 | 84.3                                     |
|            | CHOS     | 201                 | 49.1                                     |
|            | CHONS    | 83                  | 9.4                                      |
|            | CHN      | 2                   | 0.1                                      |
|            | CHNS     | 22                  | 2.5                                      |
| MDY-Winter | Total    | 1125                | 337.8                                    |
|            | CHO      | 544                 | 184.2                                    |
|            | CHON     | 172                 | 76.9                                     |
|            | CHOS     | 269                 | 63.6                                     |
|            | CHONS    | 109                 | 9.9                                      |
|            | CHN      | 3                   | 0.4                                      |
|            | CHNS     | 27                  | 2.7                                      |

144  
145  
146  
147  
148  
149  
150  
151

152 **Reference:**

153 Fuller, S. J., Zhao, Y., Cliff, S. S., Wexler, A. S., and Kalberer, M.: Direct surface analysis of time-  
154 resolved aerosol impactor samples with ultrahigh-resolution mass spectrometry, *Anal. Chem.*, 84,  
155 9858-9864, <https://doi.org/10.1021/ac3020615>, 2012.  
156 Hu, M., Krauss, M., Brack, W., and Schulze, T.: Optimization of LC-Orbitrap-HRMS acquisition and  
157 MZmine 2 data processing for nontarget screening of environmental samples using design of

158 experiments, *Anal. Bioanal. Chem.*, 408, 7905-7915, <https://doi.org/10.1007/s00216-016-9919-8>,  
159 2016.

160 Katajamaa, M., Miettinen, J., and Oresic, M.: MZmine: toolbox for processing and visualization of mass  
161 spectrometry based molecular profile data, *Bioinformatics*, 22, 634-636,  
162 <https://doi.org/10.1093/bioinformatics/btk039>, 2006.

163 Kind, T. and Fiehn, O.: Seven Golden Rules for heuristic filtering of molecular formulas obtained by  
164 accurate mass spectrometry, *BMC Bioinf.*, 8, 105, <https://doi.org/10.1186/1471-2105-8-105>, 2007.

165 Koch, B. P. and Dittmar, T.: From mass to structure: An aromaticity index for high-resolution mass data  
166 of natural organic matter, *Rapid Commun. Mass Spectrom.*, 20, 926-932,  
167 <https://doi.org/10.1002/rcm.2386>, 2006.

168 Lin, P., Rincon, A. G., Kalberer, M., and Yu, J. Z.: Elemental composition of HULIS in the Pearl River  
169 Delta Region, China: results inferred from positive and negative electrospray high resolution mass  
170 spectrometric data, *Environ. Sci. Technol.*, 46, 7454-7462, <https://doi.org/10.1021/es300285d>,  
171 2012a.

172 Lin, P., Yu, J. Z., Engling, G., and Kalberer, M.: Organosulfates in humic-like substance fraction isolated  
173 from aerosols at seven locations in East Asia: a study by ultra-high-resolution mass spectrometry,  
174 *Environ. Sci. Technol.*, 46, 13118-13127, <https://doi.org/10.1021/es303570y>, 2012b.

175 Pluskal, T., Castillo, S., Villar-Briones, A., and Orešič, M.: MZmine 2: Modular framework for  
176 processing, visualizing, and analyzing mass spectrometry-based molecular profile data, *BMC*  
177 *Bioinf.*, 11, 395, <https://doi.org/10.1186/1471-2105-11-395>, 2010.

178 Wang, X., Hayeck, N., Brüggemann, M., Yao, L., Chen, H., Zhang, C., Emmelin, C., Chen, J., George,  
179 C., and Wang, L.: Chemical characteristics of organic aerosols in Shanghai: a study by ultrahigh-  
180 performance liquid chromatography coupled with orbitrap mass spectrometry, *J. Geophys. Res-*  
181 *Atmos.*, 122, 11703-11722, <https://doi.org/10.1002/2017JD026930Digital>, 2017.

182 Wang, X. K., Rossignol, S., Ma, Y., Yao, L., Wang, M. Y., Chen, J. M., George, C., and Wang, L.:  
183 Molecular characterization of atmospheric particulate organosulfates in three megacities at the  
184 middle and lower reaches of the Yangtze River, *Atmos. Chem. Phys.*, 16, 2285-2298,  
185 <https://doi.org/10.5194/acp-16-2285-2016>, 2016.

186
